# Supplementary material for: Rapid Screening Procedures for Zero-One Optimization via Simulation
Source: Atypon-hosted journal article supplement (doi:10.1287/ijoc.1120.0504), 2012-05-05
Supplement: ijoc.1120.0504-sm-ec.pdf [file ijoc.1120.0504-sm-ec.pdf]

# Online Supplement to “Rapid Screening Procedures for Zero-One Optimization via Simulation”

Shing Chih Tsai

Department of Industrial and Information Management, National Cheng Kung University, Tainan City, Taiwan,  
sctsai@mail.ncku.edu.tw

---

## 1. Proof of Approach A

Without loss of generality we assume that there are  $k$  solutions evaluated by the proposed procedure. That is,  $\mathbf{X}_{[k]}$  is the best solution among the union of solution sets  $\bigcup_{r=0}^{R-1} \tilde{I}(r)$ . Let us consider the case when  $\mathbf{X}_{[k]}$  is generated from the 0-th iteration (i.e., one of the initial solutions), that is,  $[k] \in I(0)$ . In this case, we should obtain the smallest PCS because  $\mathbf{X}_{[k]}$  has to survive all  $R$  screening iterations to be selected at the end of the procedure. We want to show that our procedure can satisfy the PCS requirement even under the most difficult scenario. Therefore,

$$\begin{aligned} \text{PCS} \left[ \bigcup_{r=0}^{R-1} \tilde{I}(r) \right] &\geq \Pr\{\text{select } \mathbf{X}_{[k]} | [k] \in I(0)\} \\ &= 1 - \Pr\{[k] \notin I'(R) | [k] \in I(0)\} - \Pr\{\text{select } \mathbf{X}_i, i \neq [k] | [k] \in I'(R)\}. \end{aligned}$$

The above equality follows because there are only two cases when  $\mathbf{X}_{[k]}$  will not be chosen at the end: (i)  $\mathbf{X}_{[k]}$  does not survive through  $R$  iterations, and (ii)  $\mathbf{X}_{[k]}$  is contained in  $I'(R)$  but is not selected in the selection iteration. Note that cases (i) and (ii) are mutually exclusive events.

Let  $\text{PICS}(r)$  denote the probability of the event that  $\mathbf{X}_{[k]}$  is eliminated at iteration  $r$  (i.e., an incorrect selection is made). The Bonferroni inequality (e.g., Chapter 7 of Tong (1980)) is then applied to yield

$$\Pr\{[k] \notin I'(R) | [k] \in I(0)\} \leq \sum_{r=0}^{R-1} \text{PICS}(r), \quad (1)$$

where

$$\begin{aligned}
\text{PICS}(r) &= \Pr \{ \exists \ell \in I(r), \bar{Y}_{[k]}(r) - \bar{Y}_\ell(r) \leq -W_{[k]\ell}(r), \ell \neq [k] \} \\
&= 1 - \Pr \{ \bar{Y}_{[k]}(r) - \bar{Y}_\ell(r) \geq -W_{[k]\ell}(r), \forall \ell \in I(r), \ell \neq [k] \} \\
&\leq 1 - \Pr \{ \bar{Y}_{[k]}(r) - \bar{Y}_\ell(r) \geq -W_{[k]\ell}(r), \forall \ell \in \{1, 2, \dots, B(r)\}, \ell \neq [k] \} \tag{2}
\end{aligned}$$

$$\leq 1 - \prod_{\substack{\ell=1 \\ \ell \neq [k]}}^{B(r)} \Pr \{ \bar{Y}_{[k]}(r) - \bar{Y}_\ell(r) \geq -W_{[k]\ell}(r) \} \tag{3}$$

$$\leq \frac{\alpha_1}{R}. \tag{4}$$

Inequality (2) follows because  $\{\forall \ell \in \{1, 2, \dots, B(r)\}\}$  is a bigger set than  $\{\forall \ell \in I(r)\}$ , which makes the condition more restrictive. Inequality (3) holds by application of Slepian's inequality (e.g., Tong, 1980) since  $\text{Cov}[\bar{Y}_{[k]}(r) - \bar{Y}_\ell(r), \bar{Y}_{[k]}(r) - \bar{Y}_m(r)] = \text{Var}[\bar{Y}_{[k]}(r)]$ , which is nonnegative for any system  $\ell \neq m$  (note that CRN is not used). Following similar developments in Appendix 7.1 of Boesel et al. (2003) we can show that

$$\Pr \{ \bar{Y}_{[k]}(r) - \bar{Y}_\ell(r) \geq -W_{[k]\ell}(r) \} \geq (1 - \alpha')^{1/(B(r)-1)},$$

regardless of the configuration of the true means. Then we obtain Inequality (4) from the way  $\alpha'$  is chosen. Combining Inequality (1) and Inequality (4) we can conclude that  $\Pr \{ [k] \notin I'(R) | [k] \in I(0) \} \leq \alpha_1$ . This also implies that  $\Pr \{ [k] \in I'(R) \} \geq 1 - \alpha_1$  for all configurations of the true means. Furthermore, we know  $\Pr \{ \text{select } \mathbf{X}_i, i \neq [k] | [k] \in I'(R) \} \leq \alpha_2$  whenever  $\mu_{[k]} - \mu_{[k-1]} \geq \delta$ , by the similar derivation of the Extended Rinott's Procedure from Boesel et al. (2003). Even if  $\mu_{[k]} - \mu_{[k-1]} < \delta$  we can guarantee that the solution we select is within  $\delta$  of the truly best solution in  $I'(R)$  with probability  $\geq 1 - \alpha_2$  (see Theorem 1 of Nelson and Matejcek (1995)). Notice that the Rinott's constant  $h$  used to determine  $N_i$  depends on the total number of solutions sampled in the procedure (i.e.,  $B(R-1)$ ), rather than just those solutions remaining in the subset  $I'(R)$ . This is because the conditional probability of selecting the best solution, given it survives through the  $R$  screening iterations, depends on whether or not the previous samples are maintained. Finally, assuming  $\mu_{[k]} - \mu_{[k-1]} \geq \delta$  and combining the above results yield  $\text{PCS} \left[ \bigcup_{r=0}^{R-1} \tilde{I}(r) \right] \geq 1 - \alpha$ .

## 2. Proof of Approach B

Similar to the derivation of the validity of approach A, we assume  $[k] \in I(0)$  to argue that PCS can hold even in the worst case. First, we want to show that  $\Pr\{[k] \in I'(R) | [k] \in I(0)\} \geq 1 - \alpha_1$  for all configurations of the true means. We consider

$$\begin{aligned}
\Pr\{[k] \notin I'(r+1) | [k] \in I'(r)\} &= \Pr\left\{ \bigcup_{\substack{\ell \in I(r) \\ \ell \neq [k]}} \{\bar{Y}_{[k]}(r) - \bar{Y}_\ell(r) \leq -W_{[k]\ell}(r)\} \right\} \\
&\leq \sum_{\substack{\ell \in I(r) \\ \ell \neq [k]}} \Pr\{\bar{Y}_{[k]}(r) - \bar{Y}_\ell(r) \leq -W_{[k]\ell}(r)\} \\
&\leq \sum_{\substack{\ell \in I(r) \\ \ell \neq [k]}} \frac{\alpha'}{|I(r)| - 1} \\
&= 1 - (1 - \alpha_1)^{1/R}
\end{aligned} \tag{5}$$

where Inequality (5) follows because the Bonferroni inequality is applied to yield

$$\Pr\{\bar{Y}_{[k]}(r) - \bar{Y}_\ell(r) \leq -W_{[k]\ell}(r)\} \leq \frac{\alpha'}{|I(r)| - 1}$$

which is analogous to the case employing CRN in Nelson et al. (2001). Therefore, we can conclude  $\Pr\{[k] \in I'(r+1) | [k] \in I'(r)\} \geq (1 - \alpha_1)^{1/R}$  for all configurations of the true means. Because the screening statistic we use in each iteration is based on only new samples, these  $R$  screening iterations can be deemed independent of each other. Therefore, under any configuration of the true means we can obtain

$$\begin{aligned}
\Pr\{[k] \in I'(R) | [k] \in I(0)\} &= \Pr\{[k] \in I'(1) | [k] \in I(0)\} \times \prod_{r=1}^{R-1} \Pr\{[k] \in I'(r+1) | [k] \in I'(r)\} \\
&\geq 1 - \alpha_1.
\end{aligned}$$

The proof is thus attained.

## References

Boesel, J., B.L. Nelson, S.-H. Kim. 2003. Using ranking and selection to “clean up” after simulation optimization. *Oper. Res.* **54** 814–825.

Nelson, B.L., F.J. Matejcik. 1995. Using common random numbers for indifference-zone selection and multiple comparisons in simulation. *Management Sci.* **41** 1935–1945.

Nelson, B.L., J. Swann, D. Goldsman, W. Song. 2001. Simple procedures for selecting the best simulated system when the number of alternatives is large. *Oper. Res.* **49** 950–963.

Tong, Y.L. 1980. *Probability Inequalities in Multivariate Distributions*. Academic Press, New York.
